# Supplementary material
Source: MDPI journal article supplement (https://www.mdpi.com/1424-8247/17/5/628)
Supplement: s1 [file s1]

**Supplementary Table S4.** The targets of AML from Database.

| <b>DISEASES</b> | <b>MalaCards</b> | <b>DisGeNET</b> | <b>CTD</b> |
|-----------------|------------------|-----------------|------------|
| FLT3            | CEBPA            | CEBPA           | FAS        |
| RARA            | GATA2            | FLT3            | BCL2       |
| RUNX1           | DNMT3A           | NPM1            | CASP7      |
| NPM1            | JAK2             | RUNX1           | KIT        |
| CD34            | TERT             | NUP98           | MYC        |
| CD33            | FLT3             | KMT2A           | CCND2      |
| TET2            | NPM1             | KIT             | STAT3      |
| DNMT3A          | RUNX1            | ABCB1           | CDK6       |
| CEBPA           | KIT              | RUNX1T1         | FOXO1      |
| KIT             | KIT::MIR221 46   | WT1             | SGK1       |
| IDH1            | KIT::MIR222 46   | TBC1D9          | BIRC5      |
| ABL1            | KRAS             | NSD1            | TRP53      |
| TP53            | ETV6             | TET2            | SPARC      |
| IDH2            | TGM6             | VEGFA           | RARA       |
| MLLT3           | CHIC2            | MIR155          | CSF2       |
| ASXL1           | PICALM           | BCR             | AGRN       |
| RUNX1T1         | MLLT10           | BAALC           | KMT2A      |
| MYC             | NUP214           | TP53            | CSF1R      |
| CSF3            | LPP              | WLS             | NPM1       |
| BCL2            | IDH2             | MECOM           | AKT1       |
| CD38            | TP53             | MIR29A          | CD44       |
| ANPEP           | NRAS             | ABCG2           | ITGAM      |
| IL3RA           | NSD1             | IDH2            | ANXA2      |
| AKT1            | DDX41            | MPO             | CEBPD      |
| MYH11           | SF3B1            | ABCC1           | DAPK1      |
| WT1             | IDH1             | CCR7            | HSPB1      |
| KMT2A           | SRSF2            | PTPN11          | CTSH       |
| IL3             | FANCD2           | CD38            | CEBPA      |
| HOXA9           | BCOR             | FANCB           | FLT3       |
| JAK2            | DNAJC21          | MYH11           | KIT        |
| NUP98           | RTEL1            | SF3B1           | INPP4B     |
| CD19            | INSL6            | IL3             | TERT       |
| PRAM1           | LOC107303338     | IDH1            | S100A8     |
| NRAS            | LOC126807619     | SCT             | EPHX1      |
| SPI1            | LOC126861451     | CXXC5           | H1-0       |
| SRSF2           | MFSD11           | KAT6B           | MALAT1     |
| CD7             | RTEL1-TNFRSF6B   | PRAME           | RGS2       |
| CBFB            | KMT2A            | PRDM16          | HGF        |
| GATA2           | MIR126           | VEGFC           | ID2        |
| PTPRC           | MIR34B           | MVP             | MX1        |
| CSF2            | MIR204           | MARCKSL1        | RUNX1      |
| ETV6            | ERCC6L2          | CXCR4           | EIF4EBP1   |

|        |            |          |         |
|--------|------------|----------|---------|
| EZH2   | MIR320A    | ARHGEF1  | PML     |
| GATA1  | SETBP1     | ATM      | CAPN2   |
| CD8A   | SH3GL1     | GLIS2    | KRAS    |
| ANXA5  | HOTAIR     | MIR196B  | RUNX3   |
| STAT5B | HOTAIRM1   | CSF3     | CST3    |
| MCL1   | IRAIN      | CBFA2T3  | ANXA4   |
| U2AF1  | UCA1       | CREBBP   | DNMT3A  |
| MEIS1  | CDKN2B-AS1 | THPO     | IL4R    |
| CD4    | CCDC26     | NRAS     | THBD    |
| NCAM1  | CCAT1      | DNMT3A   | RAC2    |
| STAT5A | TUG1       | DNMT3B   | ABCA1   |
| DNMT1  | WT1-AS     | KAT6A    | MET     |
| PSMA7  | MEG3       | CD34     | IL17A   |
| ITGAM  | MALAT1     | MDM2     | GLI1    |
| BCL2L1 | TUSC7      | CD33     | IFNG    |
| STAT3  | MIR223HG   | IKZF1    | ENO2    |
| CASP3  | MIR142     | NCAM1    | MN1     |
| KRAS   | MIR155     | NEO1     | PPARG   |
| H3-3B  | MIR21      | PML      | S100A10 |
| H3C12  | MIR223     | MTTP     | ANXA6   |
| KITLG  | MIR23A     | MIR193B  | CD9     |
| GAPDH  | MIR125A    | PTPRA    | GFI1    |
| IL2    | MIR27A     | SALL4    | ATP1B1  |
| H3-5   | MIR22      | PCBP4    | F3      |
| H3C13  | MIR335     | TRPV2    | DHX15   |
| H3-4   | MIR23B     | SBDS     | TCEA2   |
| CTNNB1 | MIR221     | TBX22    | H1-2    |
| H3-2   | MIR30A     | PAFAH1B1 | PDE4B   |
| PML    | MIR15B     | RTEL1    | JAK2    |
| FLT3LG | MIR151A    | MIR382   | PIM2    |
| MLLT1  | MIR34C     | MIR375   | LEP     |
| BRD4   | MIR130B    | PLCB4    | RASGRP1 |
| BAALC  | MIR331     | IL17D    | MECOM   |
| MPO    | MIR324     | NTRK1    | FHL2    |
| PTEN   | MIR146A    | ASXL2    | DNMT3A  |
| EGFR   | MIR222     | PAG1     | AQP9    |
| MLLT10 | MIRLET7B   | MAPK3    | CAPG    |
| FUT4   | MIR210     | RARA     | MLLT10  |
| IFNG   | MIRLET7C   | RARRES2  | IDH1    |
| MECOM  | MIR182     | OPN1LW   | WT1     |
| CSF3R  | MIR128-1   | NUP214   | TRIO    |
| ZBTB16 | MIR424     | MLLT10   | IFI30   |
| ACTB   | MIR195     | CALM2    | LPAR1   |
| KAT6A  | MIR130A    | PTP4A2   | LPP     |

|         |          |         |         |
|---------|----------|---------|---------|
| CXCR4   | MIR328   | CALM3   | ADCY7   |
| PTPN11  | MIR199B  | PICALM  | NPM1    |
| CD44    | MIR181C  | CASP1   | ANXA5   |
| ERBB2   | MIR326   | ZNF382  | NTRK3   |
| CCND1   | MIRLET7E | RUNX3   | CTNNA1  |
| PARP1   | MIR372   | CBFB    | RETN    |
| AFF1    | MIR30D   | ABCC3   | ASXL2   |
| CDKN2A  | MIR27B   | CES2    | CTS2    |
| MDM2    | MIR451A  | SOCS2   | IDH2    |
| IL6     | MIR184   | ABCC10  | VOPP1   |
| ZRSR2   | MIR374A  | USP10   | TRIB3   |
| TNF     | MIR340   | CD6     | ROCK1   |
| CD274   | MIR367   | CD19    | ZBTB7A  |
| RUNX2   | MIR302D  | ASRGL1  | WT1     |
| KLRK1   | MIR128-2 | CALM1   | FLT3    |
| KDM1A   | MIR147A  | TFPI2   | PXDN    |
| CLEC12A | MIR181A2 | BCL2    | RUNX1T1 |
| HIF1A   | MIR325   | BCL3    | MYH11   |
| CD2     |          | SRSF2   | GATA2   |
| SRC     |          | NOM1    | PSIP1   |
| FCGR3A  |          | UCA1    | NRAS    |
| DEK     |          | SLC25A1 | ME1     |
| DOT1L   |          | STAT3   | POU4F1  |
| NOTCH1  |          | TERF1   | NRAS    |
| BCL2L1  |          | TGFB1   | TUBB2A  |
| DNMT3B  |          | FRTS1   | EHD3    |
| CD22    |          | TLR2    | SEPTIN9 |
| THPO    |          | TLR4    | SPRY4   |
| PROM1   |          | MIR663A | TRH     |
| METTL3  |          | U2AF1   | ETV6    |
| NUP214  |          | YWHAE   | PTPN11  |
| CXCL12  |          | DEK     | ZBTB16  |
| FCGR3B  |          | DERL1   | EHMT2   |
| MATK    |          | SNAP91  | SPI1    |
| IKZF1   |          | GSN     | SVIL    |
| HDAC1   |          | SEPTIN6 | ERG     |
| ATM     |          | KLRK1   | CBFB    |
| CDKN1A  |          | ETV6    | DNMT3A  |
| EP300   |          | ABCA3   | IDH1    |
| HAVCR2  |          | ERG     | BAALC   |
| ABCB1   |          | ERCC2   | KMT2C   |
| TET1    |          | ELANE   | BACH2   |
| CBFA2T3 |          | EIF4E   | RAP1GAP |
| JUN     |          | EIF4A2  | TSC2    |

|              |             |         |
|--------------|-------------|---------|
| BRAF         | BRD4        | SYNGR1  |
| HLA-A        | IL27        | ITGB2   |
| CTLA4        | ABL1        | PTPN11  |
| STAG2        | GLI1        | DHCR7   |
| IL15         | HPGDS       | PICALM  |
| LCK          | GATA4       | GAS2L1  |
| BCR          | GATA2       | IDH2    |
| CALR         | GATA1       | DLEU2   |
| CASP9        | SETBP1      | RAC3    |
| MTOR         | CCDC28A     | NUMA1   |
| PXDN         | EBF3        | TET2    |
| PXDNL        | FUS         | NUP98   |
| EPO          | EIF4A1      | FXRD6   |
| ELL          | ATN1        | ENAH    |
| CSF1R        | ASXL1       | CHMP5   |
| ABCG2        | MLLT11      | ITGAX   |
| BRCA1        | EBP         | VSIG4   |
| SETBP1       | LINC02682   | LYL1    |
| FCGR1A       | NCOA2       | PRKAR1A |
| MPL          | EFS         | SMO     |
| CD47         | U2AF1L5     | ASMTL   |
| MAPK3        | CEBPZ       | ITGAL   |
| TAL1         | ABCB6       | GLI2    |
| RARS1        | KLRC4-KLRK1 | HOXA9   |
| NFKB1        | PIM2        | CHIC2   |
| HSP90AA1     | PSIP1       | DAPK2   |
| CASP8        | RHEBL1      | LTC4S   |
| GFI1         | DDX10       | NF1     |
| LOC102723407 | ZNF296      | LAT2    |
| CYCS         | CTSL        | CNR2    |
| METTL14      | CSF3R       | FNDC3B  |
| HSP90AB1     | CSF2        | GTF2I   |
| CDK2         | CSF1R       | SH3GL1  |
| XIAP         | CCDC26      | UMPS    |
| CD5          | CPOX        | ASXL1   |
| NCR3         | CNTFR       | KMT2A   |
| CDK4         | PDCD6       | DHODH   |
| SOX2         | GSTM1       | CD33    |
| BMI1         | ND3         | GPHN    |
| PDGFRB       | MIR34A      | NUP214  |
| COMMD3-BMI1  | MIR29C      | TNFSF8  |
| ALKBH5       | MIR25       | MTARC2  |
| ESR1         | MIR206      | IRF2BP2 |
| JAK1         | MIR195      | CAD     |

EGF  
DNTT  
NANOG  
CDK6  
IL1B  
CD28  
TFRC  
MYB  
PHF6  
CEBPE  
MME  
STUB1  
RUNX3  
CCK  
FTO  
GYPA  
CHEK1  
KLRC1  
CDH1  
LMO2  
CD24  
PBX1  
ASPG  
CREBBP  
IFNA1  
PDGFRA  
POU5F1  
IL10  
NCOR1  
NCR1  
E2F1  
PAX5  
PMAIP1  
ALB  
CDK9  
NTRK1  
RARG  
NSD1  
CDK1  
CD48  
CDKN2B  
RBM15  
CD226  
hsa-miR-155-5p

MIR192  
MIR183  
MIR146A  
MIR122  
MIR34B  
MDM4  
MEF2C  
ATP6  
MT3  
MSH3  
MIR370  
MIR342  
MIR335  
MN1  
MME  
AFDN  
MIR10B  
MIR100  
LRP1  
FAS  
IGFBP7  
IFNG  
HTC2  
BIRC5  
XIAP  
HOXD10  
MNX1  
HDAC1  
IL2  
IL2RG  
IL3RA  
CASC15  
RPSA  
KRAS  
KCNH2  
CD82  
JAK2  
ITGAL  
IDO1  
IL6  
ANXA2

CTCF  
DCAF7  
DDX41  
EZH2  
FLT3  
HOXB9  
KANSL1  
KMT2A  
NPM1  
NRAS  
NUP98  
RAD21  
RB1  
RUNX1  
STAG2  
TP53  
TP53  
CEBPA  
CD44  
TNFSF10  
CSF3  
MIR16-1  
NECTIN2  
MIR15A  
CEBPE  
AQP9  
SLIT2  
DEFA3  
PVR  
BIRC5

FOXO3  
TET3  
TERT  
STAT1  
AFDN  
TNFRSF9  
PLK1  
HOXA10  
ITGA2B  
PRF1  
NF1  
KLRD1  
TCF3  
DDX41  
SLAMF1  
XPO1  
ALK  
GSK3B  
ITGB3  
EPOR  
CD86  
COLEC10  
WTAP  
MN1  
KIR2DL1  
CTCF  
NCR2  
IL4  
YTHDF2  
CD80  
KDM6A  
FASLG  
CD247  
MYCN  
CEBPB  
EIF4E  
SPN  
TNFRSF8  
FN1  
FOXP3  
GZMB  
IL7  
PDCD1  
BRCA2

DCK  
BTK  
AXL  
BRD2  
TOP2B  
HDAC2  
SIRT1  
CXCL8  
FGFR1  
CDKN1B  
HOXA7  
KDR  
SMC3  
SUZ12  
BRD3  
RAD21  
FER  
JAK3  
KLF4  
RPS6KB1  
BCL6  
SNAI1  
RARB  
PRAME  
CHEK2  
SIRPA  
CCNL2  
ABCC1  
TGFB1  
PIK3CA  
YTHDF1  
MMP9  
ALDH1A1  
hsa-miR-34a-5p  
SETD2  
THY1  
H4C6  
ASB2  
GFI1B  
MAP2K1  
hsa-miR-21-5p  
ITGAX  
H4C7  
LYN

CEP70  
KDM5A  
H2BC21  
FBXW7  
LAG3  
HRAS  
SYK  
DIABLO-2  
KLRC2  
KIR3DL1  
IL7R  
CREB1  
TOP2A  
DIABLO  
SMC1A  
TCHP  
MLF1  
CCR5  
HLA-C  
AURKB  
DICER1  
CCNA1  
CD96  
TNFRSF10B  
FOXO1  
FANCA  
IDO1  
FOS  
CCNB1  
CD79A  
hsa-miR-29b-3p  
KMT2C  
TIGIT  
HDAC6  
EHMT2  
FIP1L1  
CCNA2  
AGO2  
IGF1R  
NCOA2  
CDA  
GLIS2  
CRBN  
RAD51



AURKA  
YTHDC1  
BRDT  
H2AC18  
KLF1  
GLI1  
hsa-miR-223-3p  
FGF2  
EPCAM  
H2AC20  
BCL2L2  
EWSR1  
BCORL1  
IRF8  
CD40  
FOXM1  
AR  
ZEB1  
SDC1  
EVPL  
CSF1  
LYL1  
EGR1  
HOXA5  
NCOR2  
CCND2  
MICB  
CD276  
IL1A  
PRMT5  
SMO  
EIF4EBP1  
ETS1  
RPS14  
LGR5  
HSPA4  
hsa-miR-15a-5p  
TNFSF10  
SMARCA4  
SH2B3  
BECN1  
LEF1  
CD36  
ICAM1

SHH  
GATA3  
ALKBH1  
CD27  
MDM4  
FAS  
CDH2  
PDCD1LG2  
NCL  
hsa-miR-125b-5p  
SCARB2  
VIRMA  
B2M  
RELA  
CYP3A4  
SCARB1  
hsa-miR-181a-5p  
FANCD2  
H2AX  
hsa-miR-146a-5p  
MSI2  
LAMP1  
NFKBIA  
SOCS1  
FANCC  
ANXA8  
HNRNPC  
ASXL2  
ULBP1  
hsa-miR-29a-3p  
CBL  
PBX3  
KIR2DL3  
TCL1A  
LGALS9  
CD68  
WEE1  
TNFSF9  
MIR17HG  
CD52  
SDHC  
KAT2B  
hsa-miR-126-3p  
SELL

JAG1  
MET  
GRB2  
IFNA2  
HLA-E  
VAV1  
ATRX  
NPTN  
HLA-B  
CD69  
MX1  
YTHDC2  
hsa-miR-17-5p  
HOXD13  
HNF4A  
PIM2  
CBFA2T2  
CCL2  
NECTIN2  
PKM  
RHOA  
FH  
PVR  
CENPV  
CFLAR  
hsa-miR-150-5p  
BCL2A1  
HOXB4  
MUC1  
HDAC4  
ELANE  
TRIB2  
RNF4  
APAF1  
PIK3CD  
SUV39H1  
F3  
MMP2  
TLR4  
CD1D  
SNAI2  
IL18  
ZAP70  
NSD2

RCOR1  
EIF2AK3  
hsa-miR-20a-5p  
DNMT3L  
CDKN3  
EPAS1  
CD9  
KAT5  
MMUT  
KDM4C  
FANCG  
IL17A  
SBDS  
RET  
INS  
TNFRSF4  
PPARG  
IGF1  
BRD9  
PPM1D  
CD1C  
hsa-miR-145-5p  
TCL1B  
IRF1  
CCND3  
TP53BP1  
HOXA4  
CDC42  
B3GAT1  
IFNA17  
RAF1  
SLCO6A1  
CDK7  
hsa-miR-221-3p  
SOCS2  
FLT1  
BIRC2  
ATG7  
YTHDF3  
KDM4A  
MLLT11  
DAXX  
KAT6B  
MGMT

CD40LG  
NEDD8  
YY1  
IFNA13  
MAPK1  
ANKRD26  
DROSHA  
HNMT  
Hsa-let-7a-5p  
CTAG1B  
TDG  
NES  
LDHA  
TRIM24  
TNFRSF10A  
DHODH  
IFNA14  
MAPK8  
hsa-miR-193a-3p  
ERG  
STK11  
IFNA8  
IFNA10  
KDM6B  
CCR7  
IFNA6  
IFNA7  
SLC2A1  
TRIB1  
IFNA5  
IFNA4  
PRMT1  
IFNA16  
IFNA21  
CRYGC  
ANXA2  
SMAD2  
CSNK1A1  
CCL5  
SUMO1  
KAT2A  
MAPRE2  
ATG5  
IRF4

NUMA1  
SMAD3  
HDAC8  
CD70  
PHGDH  
INVS  
WDR5  
REL  
PECAM1  
DAPK1  
AANAT  
AARS1  
ABCA3

---
