# Supplementary material
Source: MDPI journal article supplement (https://www.mdpi.com/1424-8247/17/5/628)
Supplement: s1 [file s1]

**Supplementary Table S1.** The sequences of primers used in this study

| Genes                           | Primer sequence                                                                              |
|---------------------------------|----------------------------------------------------------------------------------------------|
| <i><math>\beta</math>-actin</i> | Forward primer: 5'-CATGTACGTTGCTATCCAGGC-3'<br>Reverse primer: 5'-CTCCTTAATGTCACGCACGAT-3'   |
| <i>GATA1</i>                    | Forward primer: 5'-TGGTGGCTTTATGGTGGTG-3'<br>Reverse primer: 5'-CCTTGGTAGAGATGGGCAGT-3'      |
| <i>EKLF</i>                     | Forward primer: 5'-GGTTGCGGCAAGAGCTACA-3'<br>Reverse primer: 5'-GTCAGAGCGCGAAAAAGCAC-3'      |
| <i>GP6</i>                      | Forward primer: 5'-CGCTGAACTGACCGTCTCATTC-3'<br>Reverse primer: 5'-CAGGTTGCCCTTGGTGTAGTAC-3' |
| <i>GFI1B</i>                    | Forward primer: 5'-AGTTCTGCGGCAAGCGTTTCCA-3'<br>Reverse primer: 5'-TTTCCGCACACCTGGCACTTGT-3' |
| <i>RUNX1</i>                    | Forward primer: 5'-GAGCTTGTCTTTTCCGAGC-3'<br>Reverse primer: 5'-GCACAGAAGGAGAGGCAATG-3'      |
| <i>PDGFRB</i>                   | Forward primer: 5'-CAAGGACACCATGCGGCTTC-3'<br>Reverse primer: 5'-AGCAGGTCAGAACGAAGGTG-3'     |
