# Supplementary material
Source: MDPI journal article supplement (https://www.mdpi.com/1424-8247/17/5/628)
Supplement: s1 [file s1]

**Supplementary Table S3.** Results of predicted targets through SwissTargetPrediction.

| Target                                                     | Common name | Uniprot ID | ChEMBL ID     | Target Class                        | Probability | Known actives (3D/2D) |
|------------------------------------------------------------|-------------|------------|---------------|-------------------------------------|-------------|-----------------------|
| Splicing factor 3B subunit 3                               | SF3B3       | Q15393     | CHEMBL1250378 | Unclassified protein                | 0.05564795  | 9/0                   |
| CDK2/Cyclin A                                              | CCNA2       | P20248     | CHEMBL3038469 | Kinase                              | 0.05564795  | 41/0                  |
|                                                            | CDK2        | P24941     |               |                                     |             |                       |
| MAP kinase ERK2                                            | MAPK1       | P28482     | CHEMBL4040    | Kinase                              | 0.05564795  | 185/0                 |
| Muscarinic acetylcholine receptor M4                       | CHRM4       | P08173     | CHEMBL1821    | Family A G protein-coupled receptor | 0.05564795  | 11/0                  |
| Muscarinic acetylcholine receptor M5                       | CHRM5       | P08912     | CHEMBL2035    | Family A G protein-coupled receptor | 0.05564795  | 7/0                   |
| Muscarinic acetylcholine receptor M3                       | CHRM3       | P20309     | CHEMBL245     | Family A G protein-coupled receptor | 0.05564795  | 26/0                  |
| Macrophage colony stimulating factor receptor              | CSF1R       | P07333     | CHEMBL1844    | Kinase                              | 0.05564795  | 98/0                  |
| Serine/threonine-protein kinase mTOR                       | MTOR        | P42345     | CHEMBL2842    | Kinase                              | 0.05564795  | 507/0                 |
| Cannabinoid receptor 1 (by homology)                       | CNR1        | P21554     | CHEMBL218     | Family A G protein-coupled receptor | 0.05564795  | 108/0                 |
| Microtubule-associated protein 2                           | MAP2        | P11137     | CHEMBL2390810 | Unclassified protein                | 0.05564795  | 5/0                   |
| Protein-tyrosine phosphatase 1B                            | PTPN1       | P18031     | CHEMBL335     | Phosphatase                         | 0.05564795  | 248/15                |
| Epidermal growth factor receptor erbB1                     | EGFR        | P00533     | CHEMBL203     | Kinase                              | 0.05564795  | 263/0                 |
| Dual specificity mitogen-activated protein kinase kinase 1 | MAP2K1      | Q02750     | CHEMBL3587    | Kinase                              | 0.05564795  | 125/0                 |
| Tyrosine-protein kinase SYK                                | SYK         | P43405     | CHEMBL2599    | Kinase                              | 0.05564795  | 300/0                 |
| Sorbitol dehydrogenase                                     | SORD        | Q00796     | CHEMBL2275    | Enzyme                              | 0.05564795  | 27/0                  |
| Interleukin-8 receptor B                                   | CXCR2       | P25025     | CHEMBL2434    | Family A G protein-coupled receptor | 0.05564795  | 37/0                  |
| Adenosine A2a receptor                                     | ADORA2A     | P29274     | CHEMBL251     | Family A G protein-coupled receptor | 0.05564795  | 410/0                 |

|                                           |                        |                            |               |                                        |            |       |
|-------------------------------------------|------------------------|----------------------------|---------------|----------------------------------------|------------|-------|
| Cytosolic phospholipase A2                | PLA2G4A                | P47712                     | CHEMBL3816    | Enzyme                                 | 0.05564795 | 20/0  |
| Cytosolic phospholipase A2<br>gamma       | PLA2G4C                | Q9UP65                     | CHEMBL4834    | Enzyme                                 | 0.05564795 | 1/0   |
| Cannabinoid receptor 2                    | CNR2                   | P34972                     | CHEMBL253     | Family A G protein-coupled<br>receptor | 0.05564795 | 99/0  |
| DNA-dependent protein kinase              | PRKDC                  | P78527                     | CHEMBL3142    | Kinase                                 | 0.05564795 | 59/0  |
| Sodium/glucose cotransporter 2            | SLC5A2                 | P31639                     | CHEMBL3884    | Electrochemical transporter            | 0.05564795 | 379/0 |
| Sodium/glucose cotransporter 1            | SLC5A1                 | P13866                     | CHEMBL4979    | Electrochemical transporter            | 0.05564795 | 139/0 |
| MAP kinase p38 alpha                      | MAPK14                 | Q16539                     | CHEMBL260     | Kinase                                 | 0.05564795 | 240/0 |
| Cyclin-dependent kinase 4                 | CDK4                   | P11802                     | CHEMBL331     | Kinase                                 | 0.05564795 | 83/0  |
| Sphingosine 1-phosphate receptor<br>Edg-3 | S1PR3                  | Q99500                     | CHEMBL3892    | Family A G protein-coupled<br>receptor | 0.05564795 | 80/0  |
| Sphingosine 1-phosphate receptor<br>Edg-1 | S1PR1                  | P21453                     | CHEMBL4333    | Family A G protein-coupled<br>receptor | 0.05564795 | 112/0 |
| Renin                                     | REN                    | P00797                     | CHEMBL286     | Protease                               | 0.05564795 | 530/0 |
| Growth factor receptor-bound<br>protein 2 | GRB2                   | P62993                     | CHEMBL3663    | Other cytosolic protein                | 0.05564795 | 53/0  |
| Cyclin-dependent kinase 2/cyclin<br>A     | CDK2<br>CCNA1<br>CCNA2 | P24941<br>P78396<br>P20248 | CHEMBL2094128 | Other cytosolic protein                | 0.05564795 | 28/0  |
| c-Jun N-terminal kinase 1                 | MAPK8                  | P45983                     | CHEMBL2276    | Kinase                                 | 0.05564795 | 100/0 |
| Nerve growth factor receptor Trk-<br>A    | NTRK1                  | P04629                     | CHEMBL2815    | Kinase                                 | 0.05564795 | 135/0 |
| P2X purinoceptor 3                        | P2RX3                  | P56373                     | CHEMBL2998    | Ligand-gated ion channel               | 0.05564795 | 209/0 |
| Cyclin-dependent kinase 2                 | CDK2                   | P24941                     | CHEMBL301     | Kinase                                 | 0.05564795 | 85/0  |
| Cyclin-dependent kinase 1                 | CDK1                   | P06493                     | CHEMBL308     | Kinase                                 | 0.05564795 | 77/0  |
| Tyrosine-protein kinase JAK2              | JAK2                   | O60674                     | CHEMBL2971    | Kinase                                 | 0.05564795 | 104/0 |
| Poly [ADP-ribose] polymerase-1            | PARP1                  | P09874                     | CHEMBL3105    | Enzyme                                 | 0.05564795 | 42/0  |

|                                             |                                                     |                                                          |               |                                     |            |       |
|---------------------------------------------|-----------------------------------------------------|----------------------------------------------------------|---------------|-------------------------------------|------------|-------|
| Gamma-secretase                             | PSEN2<br>PSENEN<br>NCSTN<br>APH1A<br>PSEN1<br>APH1B | P49810<br>Q9NZ42<br>Q92542<br>Q96BI3<br>P49768<br>Q8WW43 | CHEMBL2094135 | Protease                            | 0.05564795 | 45/4  |
| Adenosine A3 receptor                       | ADORA3                                              | P0DMS8                                                   | CHEMBL256     | Family A G protein-coupled receptor | 0.05564795 | 333/0 |
| PI3-kinase p110-beta subunit                | PIK3CB                                              | P42338                                                   | CHEMBL3145    | Enzyme                              | 0.05564795 | 83/0  |
| PI3-kinase p110-alpha subunit               | PIK3CA                                              | P42336                                                   | CHEMBL4005    | Enzyme                              | 0.05564795 | 400/0 |
| p53-binding protein Mdm-2                   | MDM2                                                | Q00987                                                   | CHEMBL5023    | Other nuclear protein               | 0.05564795 | 121/0 |
| NAD-dependent deacetylase sirtuin 2         | SIRT2                                               | Q8IXJ6                                                   | CHEMBL4462    | Eraser                              | 0.05564795 | 4/0   |
| Zinc finger protein GLI1                    | GLI1                                                | P08151                                                   | CHEMBL5461    | Transcription factor                | 0.05564795 | 0/2   |
| Eukaryotic initiation factor 4A-I           | EIF4A1                                              | P60842                                                   | CHEMBL2052028 | Hydrolase                           | 0.05564795 | 11/0  |
| Cyclin-dependent kinase 1/cyclin B          | CCNB3<br>CDK1<br>CCNB1<br>CCNB2                     | Q8WWL7<br>P06493<br>P14635<br>O95067                     | CHEMBL2094127 | Other cytosolic protein             | 0.05564795 | 12/0  |
| MAP kinase-activated protein kinase 2       | MAPKAPK2                                            | P49137                                                   | CHEMBL2208    | Kinase                              | 0.05564795 | 21/0  |
| MAP kinase signal-integrating kinase 2      | MKNK2                                               | Q9HBH9                                                   | CHEMBL4204    | Kinase                              | 0.05564795 | 44/0  |
| Pyruvate dehydrogenase kinase isoform 1     | PDK1                                                | Q15118                                                   | CHEMBL4766    | Kinase                              | 0.05564795 | 13/0  |
| GABA receptor alpha-5 subunit               | GABRA5                                              | P31644                                                   | CHEMBL5112    | Ligand-gated ion channel            | 0.05564795 | 79/0  |
| Calpain 1                                   | CAPN1                                               | P07384                                                   | CHEMBL3891    | Protease                            | 0.05564795 | 23/0  |
| Serine/threonine-protein kinase receptor R3 | ACVRL1                                              | P37023                                                   | CHEMBL5311    | Kinase                              | 0.05564795 | 18/0  |
| Immunoglobulin epsilon Fc receptor          | FCER2                                               | P06734                                                   | CHEMBL2940    | Membrane receptor                   | 0.05564795 | 5/0   |

|                                                                                      |                |                  |               |                                     |            |       |
|--------------------------------------------------------------------------------------|----------------|------------------|---------------|-------------------------------------|------------|-------|
| Phosphodiesterase 7A                                                                 | PDE7A          | Q13946           | CHEMBL3012    | Phosphodiesterase                   | 0.05564795 | 46/0  |
| Thymidylate synthase (by homology)                                                   | TYMS           | P04818           | CHEMBL1952    | Transferase                         | 0.05564795 | 84/0  |
| Peroxisome proliferator-activated receptor gamma                                     | PPARG          | P37231           | CHEMBL235     | Nuclear receptor                    | 0.05564795 | 324/0 |
| c-Jun N-terminal kinase 3                                                            | MAPK10         | P53779           | CHEMBL2637    | Kinase                              | 0.05564795 | 33/0  |
| c-Jun N-terminal kinase 2                                                            | MAPK9          | P45984           | CHEMBL4179    | Kinase                              | 0.05564795 | 39/0  |
| Equilibrative nucleoside transporter 1                                               | SLC29A1        | Q99808           | CHEMBL1997    | Electrochemical transporter         | 0.05564795 | 85/0  |
| Receptor protein-tyrosine kinase erbB-2                                              | ERBB2          | P04626           | CHEMBL1824    | Kinase                              | 0.05564795 | 65/0  |
| FK506-binding protein 1A                                                             | FKBP1A         | P62942           | CHEMBL1902    | Isomerase                           | 0.05564795 | 67/0  |
| P2X purinoceptor 7                                                                   | P2RX7          | Q99572           | CHEMBL4805    | Ligand-gated ion channel            | 0.05564795 | 11/0  |
| Arachidonate 5-lipoxygenase                                                          | ALOX5          | P09917           | CHEMBL215     | Oxidoreductase                      | 0.05564795 | 94/0  |
| Protein-tyrosine phosphatase 2C                                                      | PTPN11         | Q06124           | CHEMBL3864    | Phosphatase                         | 0.05564795 | 47/0  |
| Angiotensin II receptor                                                              | AGTR2          | P50052           | CHEMBL4607    | Family A G protein-coupled receptor | 0.05564795 | 40/0  |
| CDC7/DBF4 (Cell division cycle 7-related protein kinase/Activator of S phase kinase) | CDC7           | O00311           | CHEMBL5443    | Kinase                              | 0.05564795 | 8/0   |
| Calmodulin                                                                           | CALM1          | P62158           | CHEMBL6093    | Unclassified protein                | 0.05564795 | 2/0   |
| Corticotropin releasing factor receptor 1                                            | CRHR1          | P34998           | CHEMBL1800    | Family B G protein-coupled receptor | 0.05564795 | 66/0  |
| Mammalian target of Rapamycin (mTORC1)                                               | FKBP1A<br>MTOR | P62942<br>P42345 | CHEMBL2221341 | Kinase                              | 0.05564795 | 13/0  |
| Serine/threonine-protein kinase Chk1                                                 | CHEK1          | O14757           | CHEMBL4630    | Kinase                              | 0.05564795 | 115/0 |
| Complement factor D                                                                  | CFD            | P00746           | CHEMBL2176771 | Protease                            | 0.05564795 | 44/0  |
| Leukocyte elastase                                                                   | ELANE          | P08246           | CHEMBL248     | Protease                            | 0.05564795 | 29/0  |
| Matrix metalloproteinase 3                                                           | MMP3           | P08254           | CHEMBL283     | Protease                            | 0.05564795 | 117/0 |

|                                                            |         |        |            |                                            |            |       |
|------------------------------------------------------------|---------|--------|------------|--------------------------------------------|------------|-------|
| PI3-kinase p110-delta subunit                              | PIK3CD  | O00329 | CHEMBL3130 | Enzyme                                     | 0.05564795 | 69/0  |
| Matrix metalloproteinase 1                                 | MMP1    | P03956 | CHEMBL332  | Protease                                   | 0.05564795 | 129/0 |
| Adenosine kinase                                           | ADK     | P55263 | CHEMBL3589 | Enzyme                                     | 0.05564795 | 104/0 |
| Matrix metalloproteinase 8                                 | MMP8    | P22894 | CHEMBL4588 | Protease                                   | 0.05564795 | 66/0  |
| Smoothened homolog                                         | SMO     | Q99835 | CHEMBL5971 | Frizzled family G protein-coupled receptor | 0.05564795 | 31/0  |
| Serine/threonine-protein kinase Aurora-B                   | AURKB   | Q96GD4 | CHEMBL2185 | Kinase                                     | 0.05564795 | 106/0 |
| Inhibitor of nuclear factor kappa B kinase epsilon subunit | IKBKE   | Q14164 | CHEMBL3529 | Kinase                                     | 0.05564795 | 36/0  |
| Serine/threonine-protein kinase TBK1                       | TBK1    | Q9UHD2 | CHEMBL5408 | Kinase                                     | 0.05564795 | 37/0  |
| Aldehyde dehydrogenase                                     | ALDH2   | P05091 | CHEMBL1935 | Oxidoreductase                             | 0.05564795 | 4/0   |
| Beta-glucocerebrosidase (by homology)                      | GBA     | P04062 | CHEMBL2179 | Enzyme                                     | 0.05564795 | 52/0  |
| Phosphodiesterase 4B                                       | PDE4B   | Q07343 | CHEMBL275  | Phosphodiesterase                          | 0.05564795 | 90/0  |
| Matrix metalloproteinase 2                                 | MMP2    | P08253 | CHEMBL333  | Protease                                   | 0.05564795 | 180/0 |
| Geranylgeranyl transferase type I beta subunit             | PGGT1B  | P53609 | CHEMBL4135 | Enzyme                                     | 0.05564795 | 1/0   |
| Oxytocin receptor                                          | OXTR    | P30559 | CHEMBL2049 | Family A G protein-coupled receptor        | 0.05564795 | 18/0  |
| Cyclin T1                                                  | CCNT1   | O60563 | CHEMBL2108 | Other cytosolic protein                    | 0.05564795 | 79/0  |
| Mu opioid receptor                                         | OPRM1   | P35372 | CHEMBL233  | Family A G protein-coupled receptor        | 0.05564795 | 248/0 |
| Delta opioid receptor (by homology)                        | OPRD1   | P41143 | CHEMBL236  | Family A G protein-coupled receptor        | 0.05564795 | 250/0 |
| Ephrin receptor                                            | EPHB4   | P54760 | CHEMBL5147 | Kinase                                     | 0.05564795 | 31/0  |
| Mitogen-activated protein kinase kinase kinase 14          | MAP3K14 | Q99558 | CHEMBL5888 | Kinase                                     | 0.05564795 | 194/0 |
| DNA polymerase alpha subunit                               | POLA1   | P09884 | CHEMBL1828 | Transferase                                | 0.05564795 | 1/0   |

|                                       |       |        |            |                   |            |       |
|---------------------------------------|-------|--------|------------|-------------------|------------|-------|
| Rho-associated protein kinase 2       | ROCK2 | O75116 | CHEMBL2973 | Kinase            | 0.05564795 | 71/0  |
| Histone deacetylase 1                 | HDAC1 | Q13547 | CHEMBL325  | Eraser            | 0.05564795 | 120/0 |
| Hepatocyte growth factor receptor     | MET   | P08581 | CHEMBL3717 | Kinase            | 0.05564795 | 155/0 |
| Acyl-CoA desaturase                   | SCD   | O00767 | CHEMBL5555 | Enzyme            | 0.05564795 | 43/0  |
| Insulin-like growth factor I receptor | IGF1R | P08069 | CHEMBL1957 | Kinase            | 0.05564795 | 102/0 |
| Tyrosine-protein kinase LCK           | LCK   | P06239 | CHEMBL258  | Kinase            | 0.05564795 | 72/0  |
| Cholesteryl ester transfer protein    | CETP  | P11597 | CHEMBL3572 | Other ion channel | 0.05564795 | 1/0   |

---
