# Supplementary material
Source: MDPI journal article supplement (https://www.mdpi.com/1424-8247/17/5/628)
Supplement: s1 [file s1]

**Supplementary Table S2.** The analysis of hub genes

| Name             | Degree | Betweenness | Closeness |
|------------------|--------|-------------|-----------|
| <i>JUN</i>       | 10     | 457.36667   | 20.70952  |
| <i>CCL5</i>      | 9      | 371.76667   | 19.9      |
| <i>ACE</i>       | 4      | 339.56667   | 15.9      |
| <i>PDGFRB</i>    | 6      | 321.8       | 18.12619  |
| <i>C3</i>        | 7      | 278.26667   | 18.73333  |
| <i>HSPG2</i>     | 8      | 268.46667   | 18.48333  |
| <i>FBN1</i>      | 6      | 198.93333   | 17.73333  |
| <i>LRP1</i>      | 5      | 136.66667   | 17.45     |
| <i>PDGFB</i>     | 5      | 120.86667   | 17.87619  |
| <i>HIST1H2AC</i> | 6      | 97          | 16.49286  |
